# Supplementary material for: Systemic AAV9.BVES delivery ameliorates muscular dystrophy in a mouse model of LGMDR25
Source: PubMed Central journal article supplement — Mol Ther. 2022 Nov 25;31(2):398–408. doi: 10.1016/j.ymthe.2022.11.012 (PMC9931600; doi:10.1016/j.ymthe.2022.11.012), 2022-11-25
Supplement: mmc1.pdf [file mmc1.pdf]

**YMTHE, Volume 31**

**Supplemental Information**

**Systemic AAV9.BVES delivery  
ameliorates muscular dystrophy  
in a mouse model of LGMDR25**

**Haiwen Li, Peipei Wang, Ethan Hsu, Kelsey M. Pinckard, Kristin I. Stanford, and Renzhi Han**

## Supplementary Information

**Table S1. ECG parameters of WT and BVES-KO male mice without or with neonatal injection of AAV9.BVES before and after exercise**

| Parameters        | Before exercise |             |                 | After exercise |             |                 |
|-------------------|-----------------|-------------|-----------------|----------------|-------------|-----------------|
|                   | WT              | KO          | neonatal (AAV9) | WT             | KO          | neonatal (AAV9) |
| RR (ms)           | 120.1±8.0       | 150.8±20.1* | 140.7±25.0      | 107.8±9.3      | 133.6±26.1* | 110.3±11.4#     |
| PR (ms)           | 44.0±12.8       | 39.9±8.1    | 47.9±7.3        | 41.7±12.4      | 37.7±6.1    | 44.9±6.4        |
| QRS duration (ms) | 14.0±1.9        | 13.8±2.1    | 15.0±2.7        | 13.7±1.8       | 14.2±2.0    | 13.1±2.0        |
| QT (ms)           | 29.2±11.5       | 36.6±8.0    | 37.3±6.6        | 30.4±10.9      | 35.9±9.7    | 37.6±10.1       |
| QTc (ms)          | 84.5±33.4       | 97.3±19.5   | 102.1±16.0      | 92.7±34.8      | 94.3±36.1   | 115.6±32.3      |
| QR (ms)           | 8.4±0.9         | 7.8±1.6     | 7.9±1.2         | 8.3±0.9        | 7.9±1.0     | 6.8±1.7         |

\* indicate significant difference between WT and KO, # indicate significant difference between KO and AAV9.BVES

**Table S2. ECG parameters of WT and BVES-KO male mice without or with adult injection of AAV9.BVES before and after exercise**

| Parameters        | Before exercise |            |              | After exercise |             |              |
|-------------------|-----------------|------------|--------------|----------------|-------------|--------------|
|                   | WT              | KO         | adult (AAV9) | WT             | KO          | adult (AAV9) |
| RR (ms)           | 117.7±14.6      | 141.8±28.0 | 142.0±36.9   | 104.3±7.3      | 118.3±14.9* | 102.4±5.3#   |
| PR (ms)           | 47.0±10.4       | 47.0±8.9   | 44.8±10.8    | 39.6±13.1      | 40.9±13.9   | 45.7±21.5    |
| QRS duration (ms) | 13.3±1.9        | 13.6±2.1   | 13.5±3.1     | 12.6±1.4       | 12.7±2.6    | 14.8±2.6     |
| QT (ms)           | 28.2±4.7        | 35.0±6.8   | 29.2±12.4    | 31.7±8.3       | 36.7±6.4    | 41.8±6.9     |
| QTc (ms)          | 76.0±23.7       | 97.2±20.8  | 82.6±41.0    | 98.6±26.5      | 107.9±16.6  | 133.2±21.4   |
| QR (ms)           | 7.4±1.4         | 7.8±1.4    | 6.7±1.6      | 6.8±1.4        | 6.2±1.4     | 7.4±1.9      |

\* indicate significant difference between WT and KO, # indicate significant difference between KO and AAV9.BVES

**Table S3. ECG parameters of WT and BVES-KO female mice without or with neonatal injection of AAV9.BVES before and after exercise**

| Parameters        | Before exercise |            |                 | After exercise |            |                 |
|-------------------|-----------------|------------|-----------------|----------------|------------|-----------------|
|                   | WT              | KO         | neonatal (AAV9) | WT             | KO         | neonatal (AAV9) |
| RR (ms)           | 119.9±8.8       | 154.0±50.7 | 124.5±13.0      | 113.8±6.8      | 123.0±7.4* | 110.6±6.3#      |
| PR (ms)           | 48.3±12.7       | 45.7±14.4  | 50.4±17.9       | 46.4±6.5       | 42.4±12.8  | 47.2±18.4       |
| QRS duration (ms) | 14.0±1.1        | 14.2±1.9   | 13.6±1.3        | 13.0±1.2       | 13.7±1.4   | 14.6±1.7        |
| QT (ms)           | 31.8±9.1        | 38.0±8.3   | 40.9±10.5       | 37.8±7.7       | 35.1±8.1   | 35.6±15.2       |
| QTc (ms)          | 92.8±27.6       | 96.7±18.4  | 116.9±31.0      | 112.3±23.6     | 101.0±22.7 | 106.4±46.1      |
| QR (ms)           | 8.4±0.6         | 8.1±1.3    | 8.0±1.4         | 7.5±1.5        | 7.3±1.3    | 7.8±1.5         |

\* indicate significant difference between WT and KO, # indicate significant difference between KO and AAV9.BVES

**Table S4. Skipped heart beats of WT and BVES-KO male mice without or with AAV9.BVES**

| Mice with skipped heart beats/total mice | WT   | KO    | Neonatal (AAV9) | Adult (AAV9) |
|------------------------------------------|------|-------|-----------------|--------------|
| Before Exercise                          | 0/17 | 10/21 | 2/10            | 0/7          |
| After Exercise                           | 1/17 | 6/21  | 1/10            | 0/7          |

**Table S5. ECHO parameters of WT and BVES-KO male mice without or with neonatal injection of AAV9.BVES**

| Parameters   | WT         | KO         | Neonatal (AAV9) |
|--------------|------------|------------|-----------------|
| CO           | 19.9±3.9   | 17.1±4.7   | 18.4±3.5        |
| LVEDD        | 3.9±0.3    | 3.8±0.5    | 4.1±0.4         |
| LVESD        | 3.2±0.6    | 2.5±0.5    | 2.9±0.4         |
| FS           | 34.4±3.3   | 34.6±6.3   | 32.7±7.2        |
| LV Mass      | 138.8±42.1 | 128.9±32.5 | 145.9±31.3      |
| LV Mass Corr | 135.2±39.2 | 103.1±26.0 | 123.1±30.2      |
| SV           | 42.4±6.9   | 38.7±7.9   | 42.2±7.7        |
| EDV          | 66.5±11.6  | 56.5±12.9  | 74.7±16.7       |
| ESV          | 24.1±6.1   | 23.5±11.0  | 32.5±10.3       |

Note: CO, cardiac output; LVEDD, left ventricular end-diastolic diameter; LVESD, left ventricular end-systolic diameter; FS, fractional shortening; LV mass, left ventricular mass; LV mass Corr, corrected left ventricular mass; SV, stroke volume; EDV, end-diastolic volume; ESV, end-systolic volume.

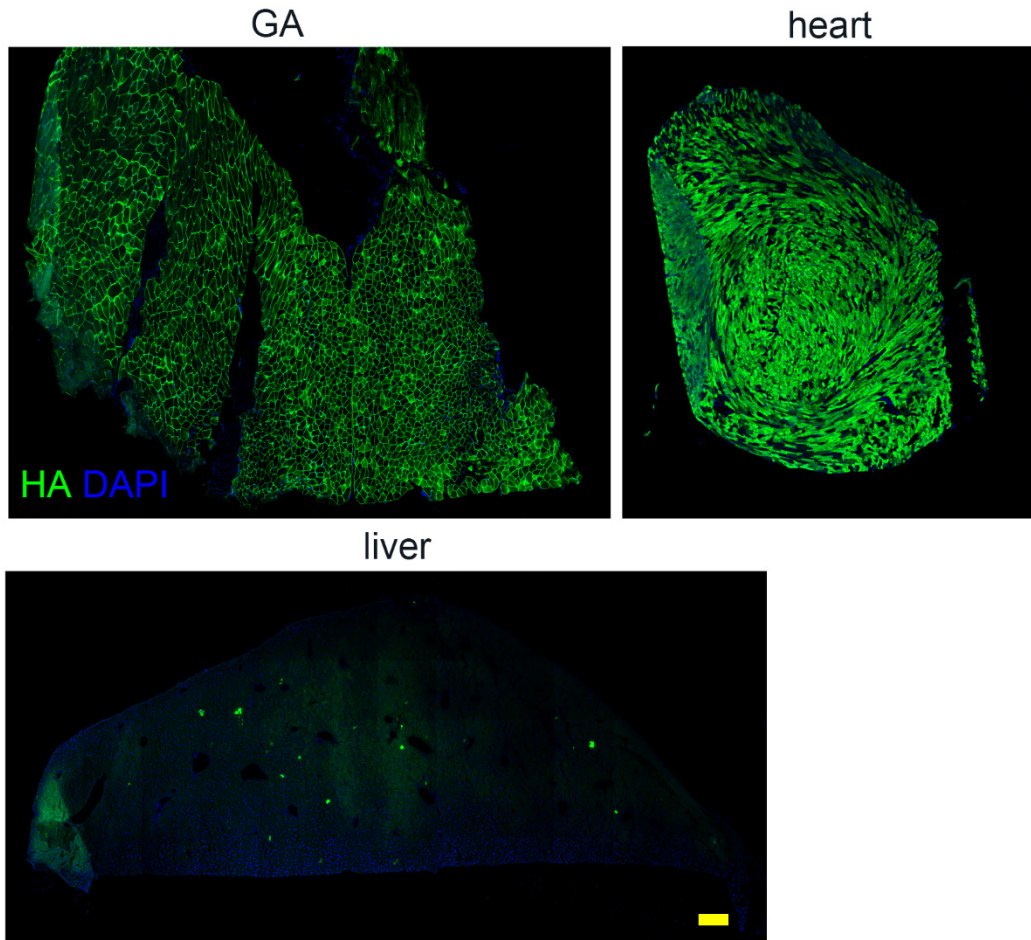

**Figure S1. Immunofluorescence staining images showing the expression of BVES transgene in male BVES-KO mouse tissues.** Representative, stitched immunofluorescence images of the entire heart, GA and liver sections stained with the anti-HA antibody from a 3-month-old BVES-KO mouse treated with AAV9.BVES at P3. Scale bars: 200  $\mu\text{m}$ .

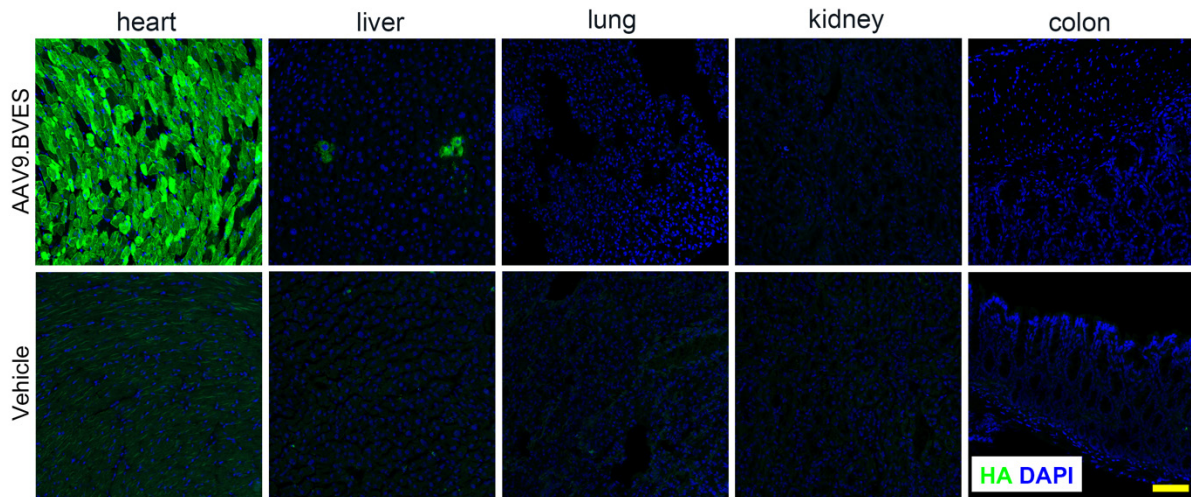

**Figure. S2. Representative immunofluorescence staining images of various tissue sections from male BVES-KO mice following AAV9.BVES administration through IP injection at P3. Scale bar: 100  $\mu$ m.**

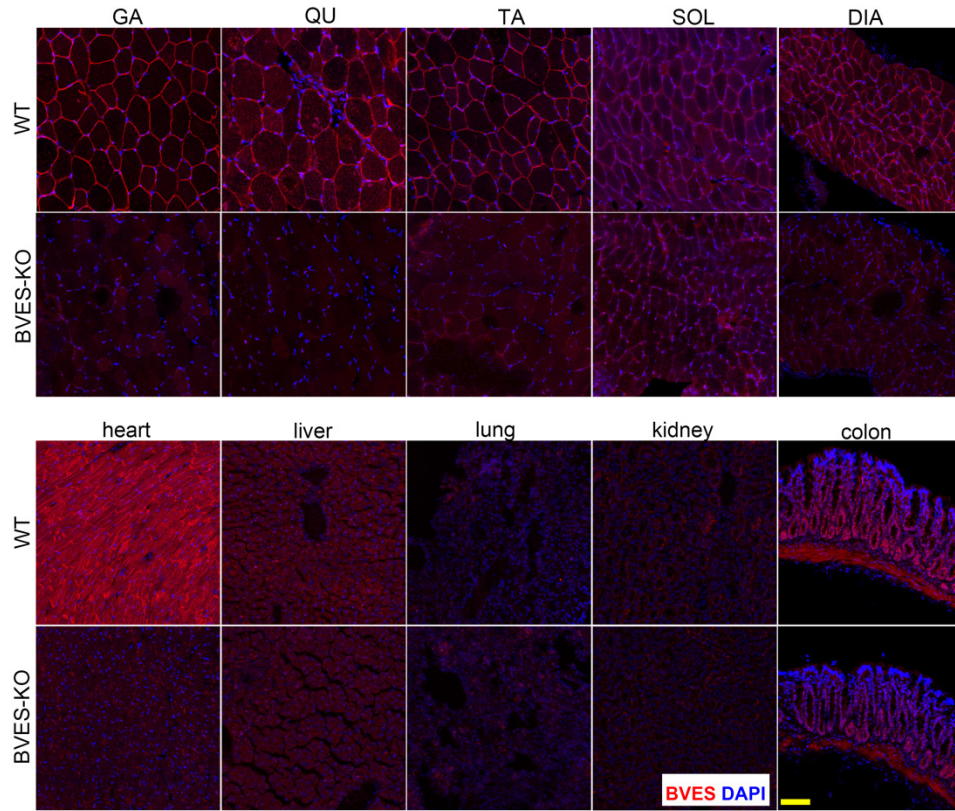

**Figure. S3. Endogenous BVES was primarily expressed in skeletal muscles and heart in WT mice. Scale bar: 100  $\mu$ m.**

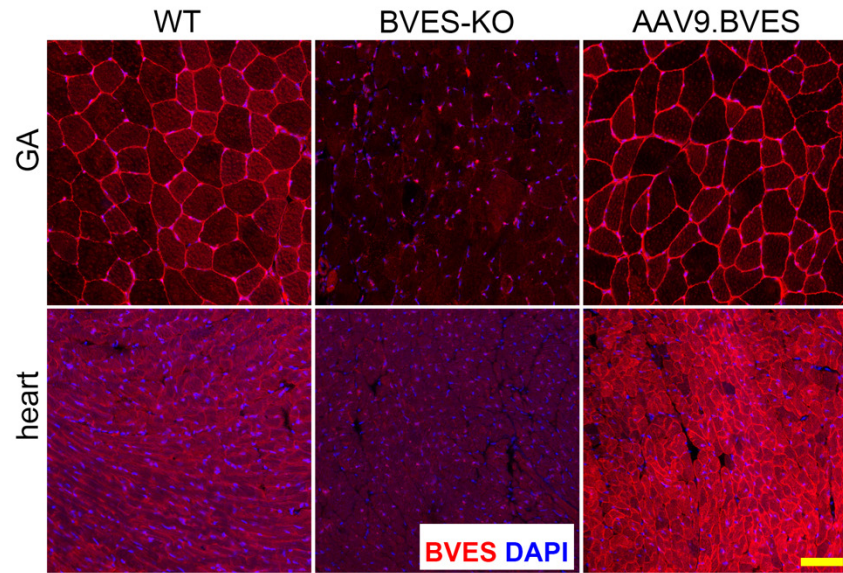

**Figure. S4. The BVES transgene showed a similar subcellular localization in skeletal muscle and heart as the endogenous BVES. Scale bar: 100  $\mu$ m.**



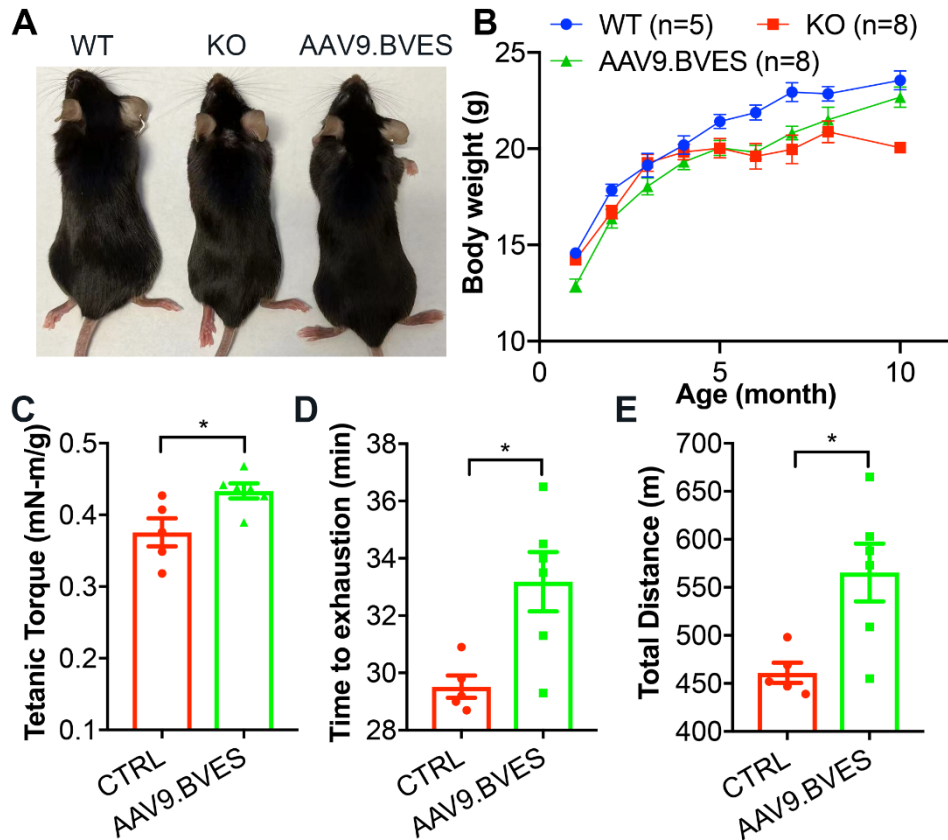

**Figure S5. Impact of AAV9.BVES treatment on muscle function and mass in female BVES-KO mice following neonatal IP administration.** (A) Representative images of female WT and BVES-KO mice treated with or without AAV9.BVES at 9 months of age. (B) Monthly body weight measurements of female WT and BVES-KO mice treated with or without AAV9.BVES. (C) Tetanic torque measurements of the posterior compartment muscles in female BVES-KO mice (5 months of age) treated with or without AAV9.BVES. (D, E) The running time to exhaustion (D) and total running distance (E) in 6-month-old female BVES-KO mice treated with or without AAV9.BVES determined by the treadmill running test. \* $P < 0.05$ .

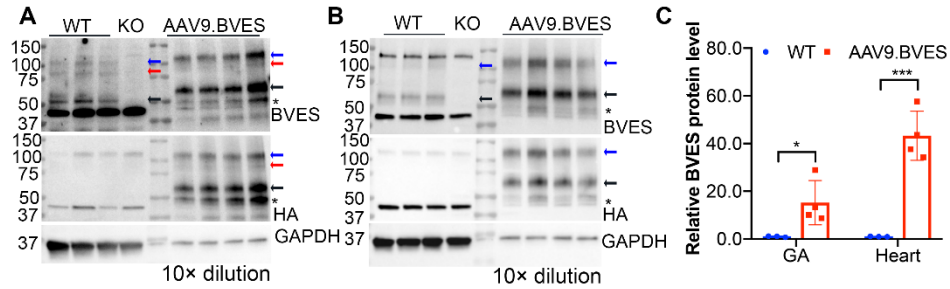

**Figure S6. Western blot analysis of BVES transgene expression following tail vein injection of AAV9.BVES in adult male mice.** Western blot showed AAV9.BVES was highly expressed in GA muscles (A) and heart (B) in BVES-KO mice with adult administration of AAV9.BVES. Arrows indicate the specific bands of BVES. The quantification was performed using ImageJ (C). \* $P < 0.05$ , \*\*\* $P < 0.001$ .

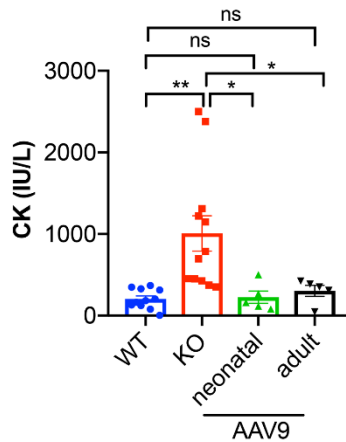

**Figure S7. Serum CK measurements in male mice.** Serum CK levels in WT and BVES-KO mice treated with or without AAV9.BVES at 9 months age. \* $P < 0.05$ .

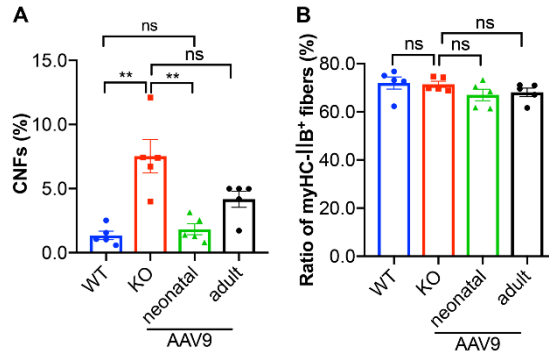

**Figure S8. Fiber number count and CNF measurement in skeletal muscles of 9-month-old WT and BVES-KO male mice treated with or without AAV9.BVES. (A)**

Quantification of CNFs in GA muscles of WT and BVES-KO mice with or without

AAV9.BVES at 9 months of age. (B) Quantification of MyHC-IIb muscle fibers versus

total fibers from GA muscles of WT and BVES-KO mice with or without AAV9.BVES at 9

months of age. Statistical differences were determined by two-way ANOVA with

Turkey's post tests. ns, not significant.  $**P < 0.01$ ; ns, not significant.

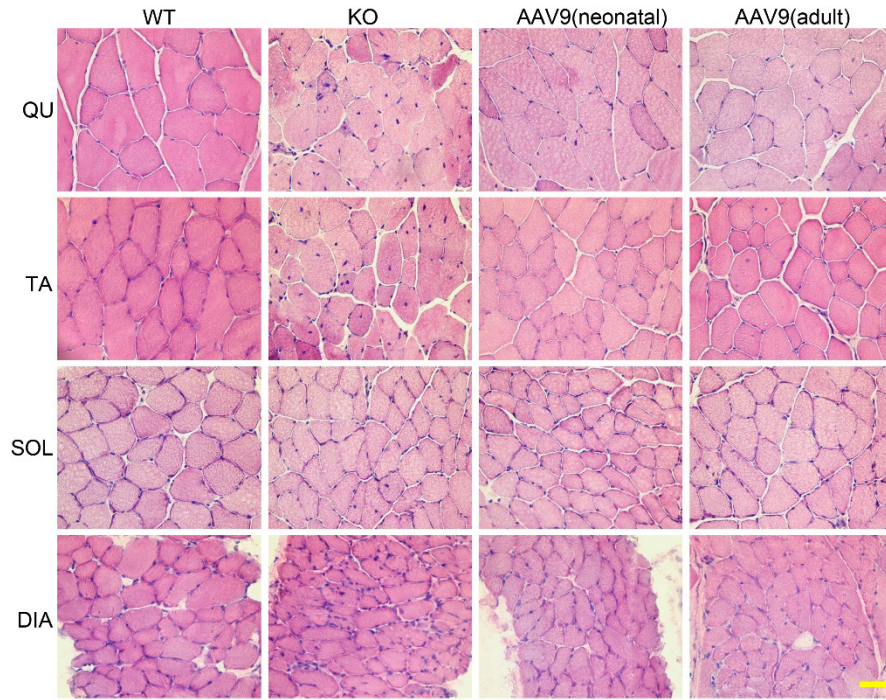

**Figure S9. H&E staining of QU, TA, SOL and DIA muscles from WT and BVES-KO mice with or without AAV9.BVES treatment. Scale bar: 100  $\mu$ m.**

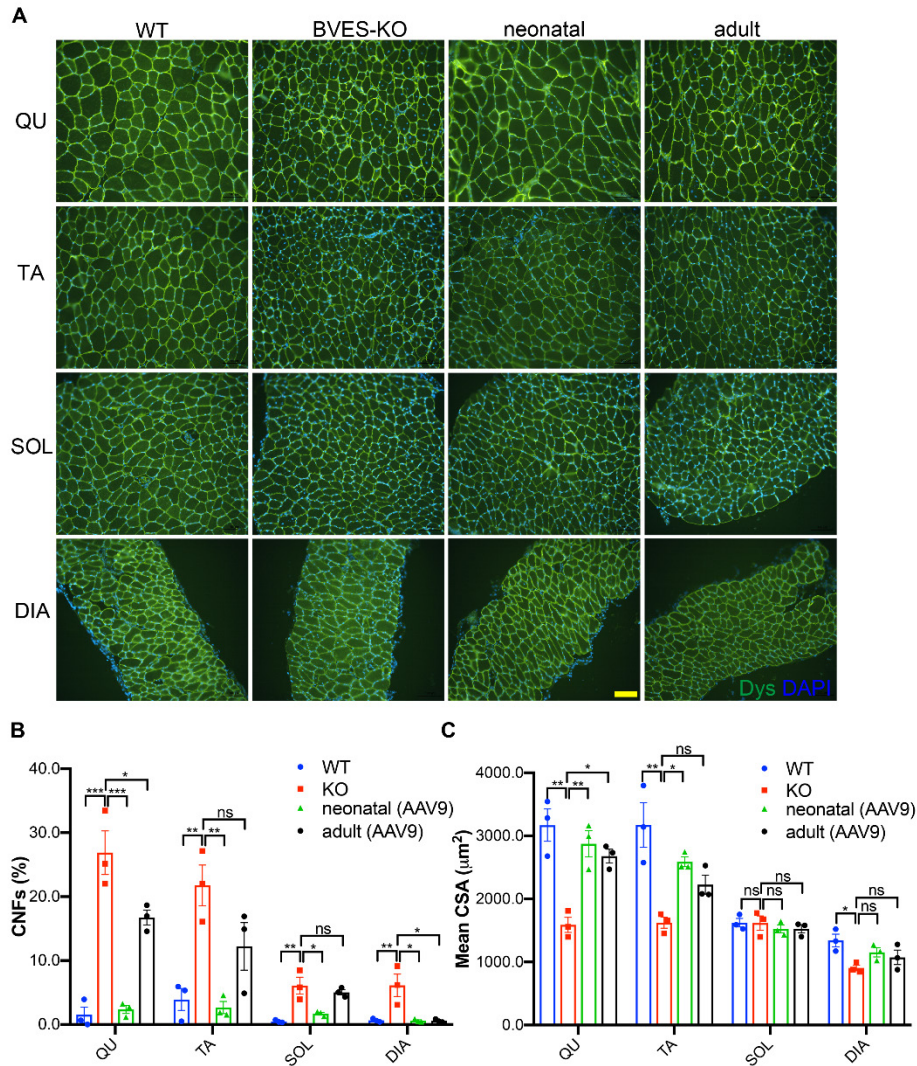

**Figure. S10. Systemic AAV9.BVES gene delivery ameliorated the histopathology in various skeletal muscles from male BVES-KO mice.** (A) Immunostaining of dystrophin (Dys) in QU, TA, SOL and DIA muscles from WT and BVES-KO mice with or without AAV9.BVES. Scale bar: 100  $\mu$ m. (B, C) Quantification of CNFs and fiber size area in QU, TA, SOL and DIA muscles from WT and BVES-KO mice with or without AAV9.BVES. Statistical differences were determined by two-way ANOVA with Turkey's post tests. \* $P < 0.05$ ; \*\* $P < 0.01$ ; \*\*\* $P < 0.001$ ; ns, not significant.

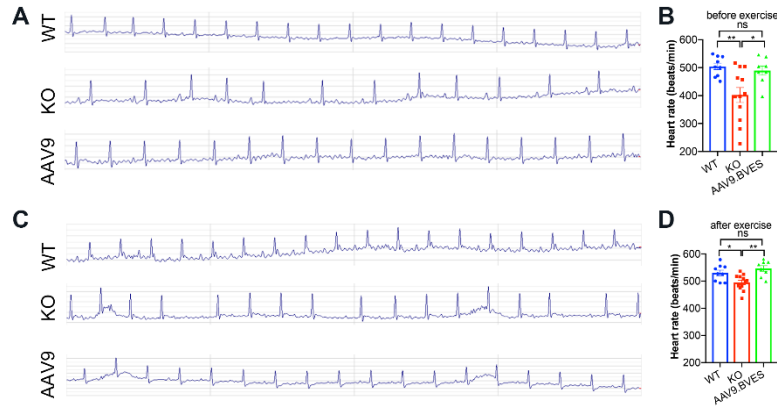

**Figure S11. Effects of AAV9.BVES treatment on the heart rate of female BVES-KO mice.** (A-D) Representative ECG recordings and heart rate of female WT and BVES-KO mice treated with or without AAV9.BVES before (A, B) and after treadmill running (C, D). \* $P < 0.05$ , \*\* $P < 0.01$ . ns, not significant (one-way ANOVA).

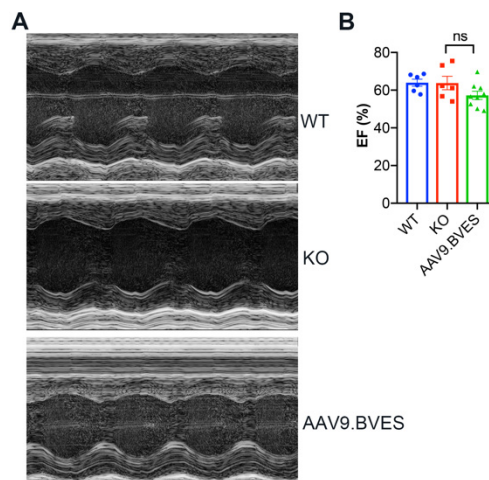

**Figure S12. Echocardiography measurement of cardiac function in male BVES-KO mice with or without AAV9.BVES treatment.** (A) Representative M-mode echocardiographic recording from 9-month-old WT and BVES-KO mice treated with or without AAV9.BVES. (B) Ejection fraction showed no significant changes among the three groups of mice.
